# Supplementary material
Source: publisher figshare collection journal article supplement (https://acs.figshare.com/ndownloader/files/12629201)
Supplement: Supplementary file 1 [file 12629201]

## Supporting Information

Facile synthesis of graphene oxide for multi-cycle adsorption of aqueous  $\text{Pb}^{2+}$  in presence of divalent cations and polyatomic anions

**Rishi Karan Singh Rathour<sup>a</sup>, Jayanta Bhattacharya<sup>a, b\*</sup>, Abhijit Mukherjee<sup>a, c</sup>**

<sup>a</sup>School of Environmental Science and Engineering, Indian Institute of Technology Kharagpur, India. E-mail: [rrathour@iitkgp.ac.in](mailto:rrathour@iitkgp.ac.in)

<sup>b</sup>Department of Mining Engineering, Indian Institute of Technology Kharagpur, India.

<sup>c</sup>Department of geology and geophysics, Indian Institute of Technology Kharagpur, India, E-mail: [abhijit@gg.iitkgp.ernet.in](mailto:abhijit@gg.iitkgp.ernet.in);

\*Corresponding author; Jayanta Bhattacharya, E-mail: [jayantab@mining.iitkgp.ernet.in](mailto:jayantab@mining.iitkgp.ernet.in);

Tel: +91 - 3222 – 283702

Figure S1. XRD spectra of Graphite.

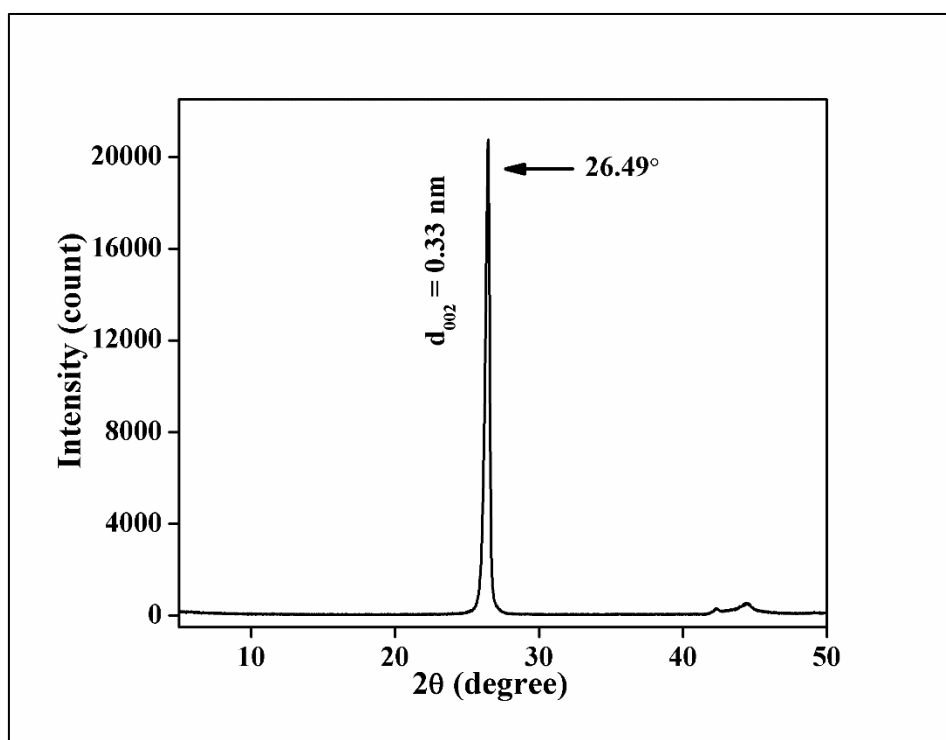

Figure S2. UV-vis spectra of Graphene oxide.

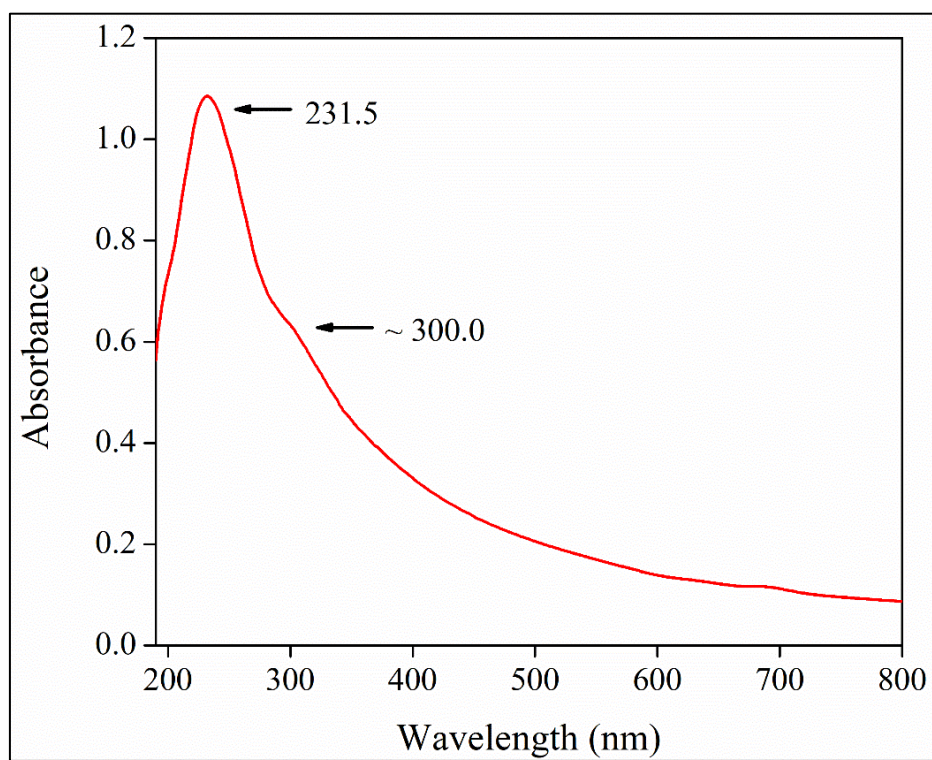

Figure S3. TEM image of  $\text{Pb}^{2+}$  adsorbed GO.

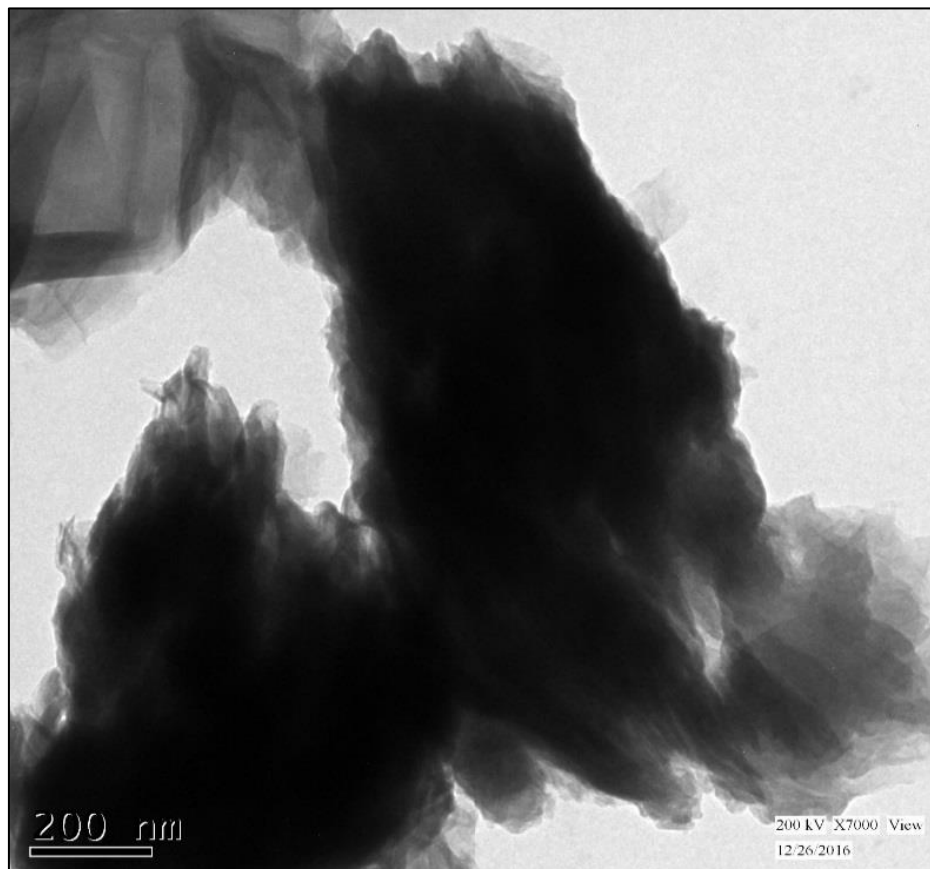

Figure S4. Thermogravimetric analysis (TGA) of GO.

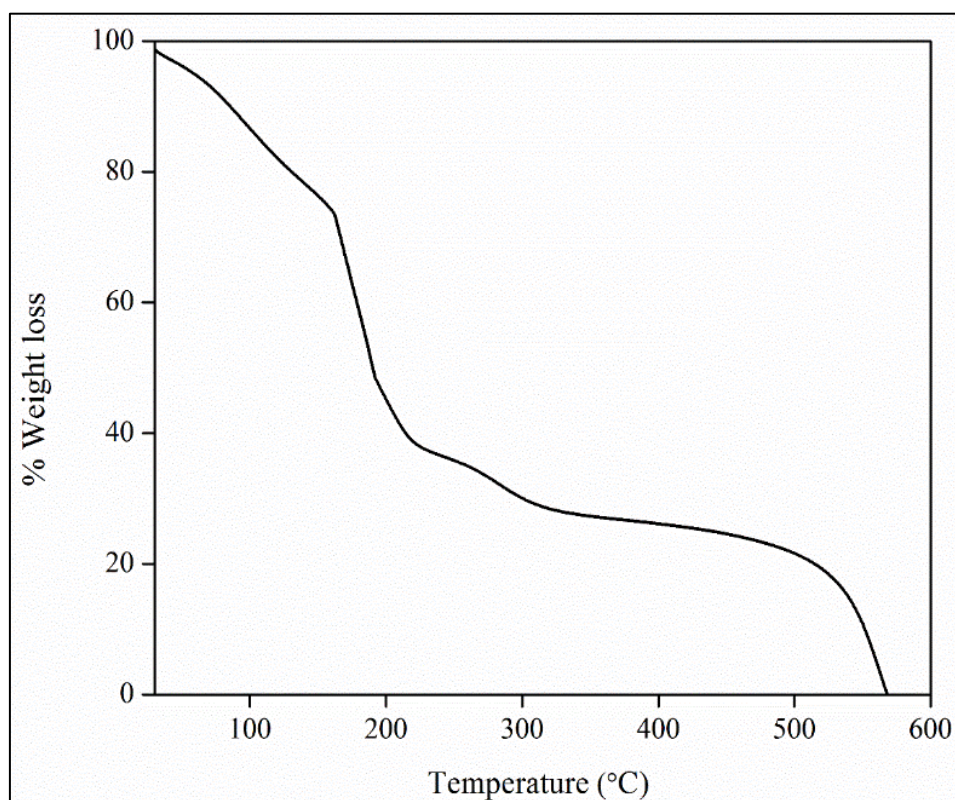

Figure S5. Effect of  $\text{SO}_4^{2-}$  and  $\text{NO}_3^-$  presence in binary system on the adsorption of  $\text{Pb}^{2+}$  by GO.

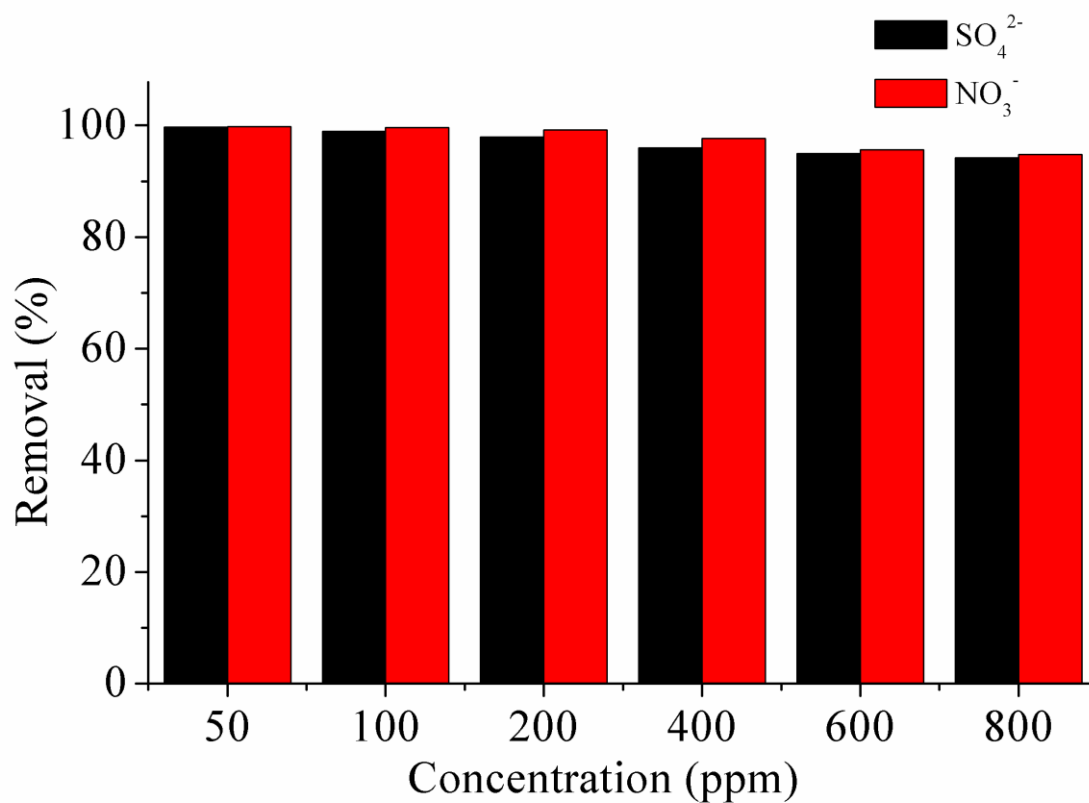

Figure S6. Effect of  $\text{SO}_4^{2-}$  and  $\text{NO}_3^-$  presence in ternary system on the adsorption of  $\text{Pb}^{2+}$  by GO.

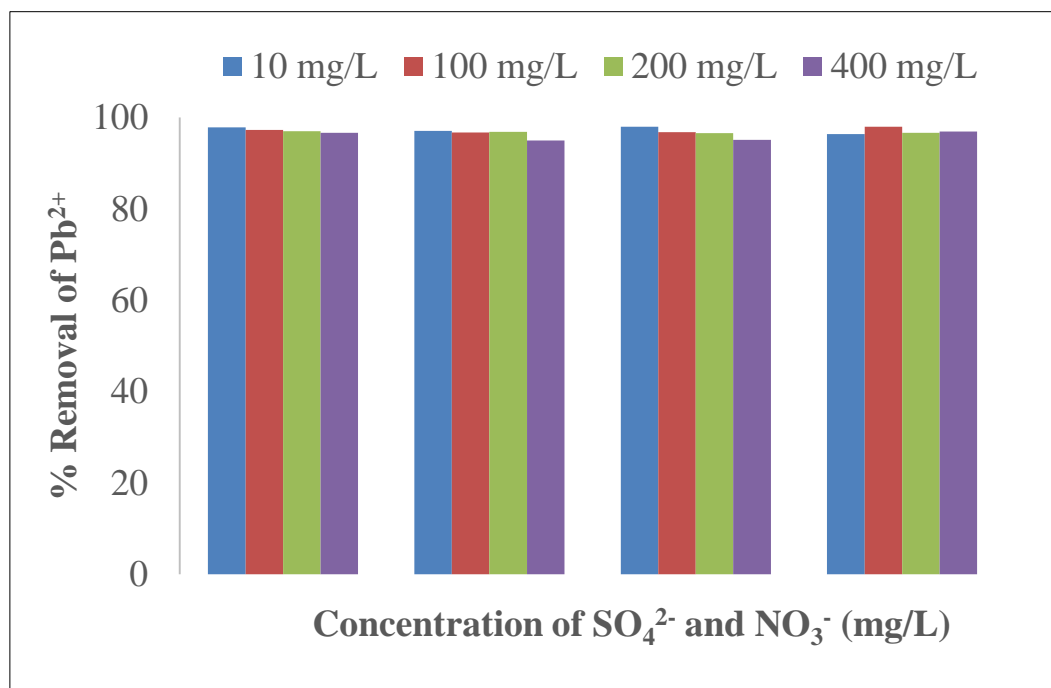

Table S1. Intraparticle diffusion model constants for  $\text{Pb}^{2+}$  adsorption on GO.

| Intraparticle diffusion | Parameter | Concentration (mg/L) |        |        |
|-------------------------|-----------|----------------------|--------|--------|
|                         |           | 50                   | 100    | 200    |
|                         | $C_i$     | 35.97                | 39.76  | 42.695 |
|                         | $K_i$     | 0.5358               | 0.1866 | 0.7748 |
|                         | $R^2$     | 0.7241               | 0.945  | 0.7628 |

Table S2: The adsorption of  $\text{Pb}^{2+}$  in binary solution  $\text{Pb}^{2+}$ — $\text{Cd}^{2+}$  or  $\text{Pb}^{2+}$ — $\text{Ni}^{2+}$ . Condition: initial concentration of  $\text{Pb}^{2+} = 50$  mg/L, pH— 5, Temperature— 303 K, Stirring speed— 170 rpm, and dose of GO— 1.00 g/L.

| Concentration $\text{Ni}^{2+}$ or $\text{Cd}^{2+}$ (mg/L) | % Removal of $\text{Pb}^{2+}$ in $\text{Pb}^{2+}$ — $\text{Ni}^{2+}$ | % Removal of $\text{Pb}^{2+}$ in $\text{Pb}^{2+}$ — $\text{Cd}^{2+}$ |
|-----------------------------------------------------------|----------------------------------------------------------------------|----------------------------------------------------------------------|
| <b>0</b>                                                  | 99.30                                                                | 99.30                                                                |
| <b>10</b>                                                 | 96.37                                                                | 96.92                                                                |
| <b>30</b>                                                 | 94.43                                                                | 89.39                                                                |
| <b>50</b>                                                 | 89.78                                                                | 88.42                                                                |

Table S3: The adsorption of  $\text{Pb}^{2+}$  in ternary solution of  $\text{Pb}^{2+}$ — $\text{Cd}^{2+}$ — $\text{Ni}^{2+}$ . Condition: pH—5, Temperature— 303 K, Stirring speed— 170 rpm, and dose of GO— 1.00 g/L.

| Concentration (mg/L) |                  |                  | % Removal of $\text{Pb}^{2+}$ |
|----------------------|------------------|------------------|-------------------------------|
| $\text{Pb}^{2+}$     | $\text{Cd}^{2+}$ | $\text{Ni}^{2+}$ |                               |
| 10                   | 10               | 10               | 99.43                         |
| 10                   | 30               | 30               | 94.11                         |

|    |    |    |       |
|----|----|----|-------|
| 10 | 50 | 50 | 91.66 |
| 30 | 10 | 10 | 96.99 |
| 30 | 30 | 30 | 89.64 |
| 30 | 50 | 50 | 87.72 |
| 50 | 10 | 10 | 92.42 |
| 50 | 30 | 30 | 84.76 |
| 50 | 50 | 50 | 80.12 |

Table S4: The adsorption of  $\text{Pb}^{2+}$  in binary solution of  $\text{Pb}^{2+}$ — $\text{SO}_4^{2-}$  and  $\text{Pb}^{2+}$ — $\text{NO}_3^-$ . Condition: initial concentration of  $\text{Pb}^{2+} = 50$  mg/L, pH— 5, Temperature— 303 K, Stirring speed— 170 rpm, and dose of GO— 1.00 g/L.

| Concentration $\text{SO}_4^{2-}$<br>or $\text{NO}_3^-$ (mg/L) | % Removal of $\text{Pb}^{2+}$ in $\text{Pb}^{2+}$ —<br>$\text{SO}_4^{2-}$ | % Removal of $\text{Pb}^{2+}$ in $\text{Pb}^{2+}$ —<br>$\text{NO}_3^-$ |
|---------------------------------------------------------------|---------------------------------------------------------------------------|------------------------------------------------------------------------|
| <b>50</b>                                                     | 99.71                                                                     | 99.75                                                                  |
| <b>100</b>                                                    | 98.92                                                                     | 99.64                                                                  |
| <b>200</b>                                                    | 97.96                                                                     | 99.18                                                                  |
| <b>400</b>                                                    | 95.97                                                                     | 97.65                                                                  |
| <b>600</b>                                                    | 94.99                                                                     | 95.65                                                                  |
| <b>800</b>                                                    | 94.21                                                                     | 94.78                                                                  |

Table S5: The adsorption of  $\text{Pb}^{2+}$  in ternary solution of  $\text{Pb}^{2+}$ — $\text{SO}_4^{2-}$ — $\text{NO}_3^-$ . Condition: initial concentration of  $\text{Pb}^{2+} = 50$  mg/L, pH— 5, Temperature— 303 K, Stirring speed— 170 rpm, and dose of GO— 1.00 g/L.

|                                                               |            | Percentage removal of $\text{Pb}^{2+}$ |            |            |            |
|---------------------------------------------------------------|------------|----------------------------------------|------------|------------|------------|
|                                                               |            | Concentration of $\text{SO}_4$ (mg/L)  |            |            |            |
|                                                               |            | <b>10</b>                              | <b>100</b> | <b>200</b> | <b>400</b> |
| <b>Concentration<br/>of <math>\text{NO}_3^-</math> (mg/L)</b> | <b>10</b>  | 97.818                                 | 97.08      | 97.96      | 96.37      |
|                                                               | <b>100</b> | 97.243                                 | 96.72      | 96.80      | 97.96      |
|                                                               | <b>200</b> | 96.99                                  | 96.81      | 96.59      | 96.65      |
|                                                               | <b>400</b> | 96.66                                  | 94.99      | 95.12      | 96.92      |
